# Supplementary material
Source: Springer Nature journal article supplement (https://www.springermedizin.de/resource/supplementary/12903_2014_483_MOESM8_ESM.pdf/9516790)

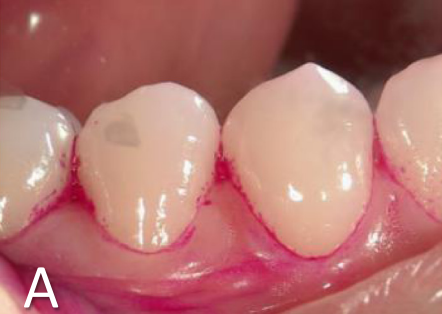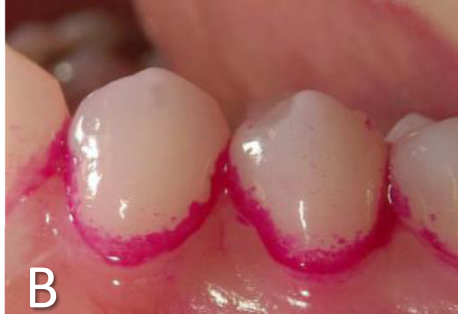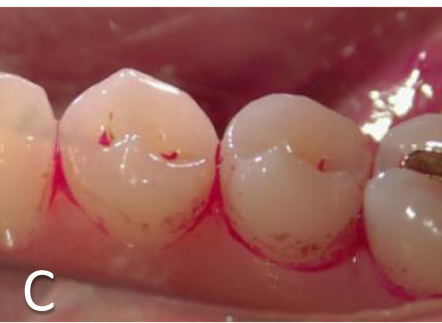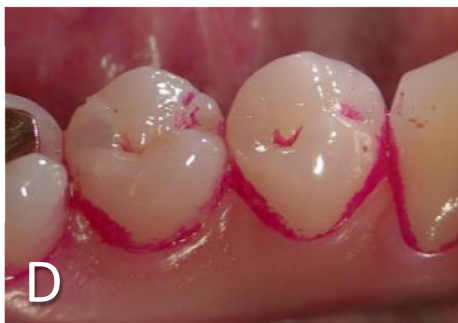

Supplement: MOESM8 [file 9516790]
